# Supplementary material for: Laser methane detector-based quantification of methane emissions from indoor-fed Fogera dairy cows
Source: PubMed Central journal article supplement (PMC8255885; doi:10.5713/ab.20.0739), 2021-01-01
Supplement: ab-20-0739-suppl.pdf [file ab-20-0739-suppl.pdf]

**Supplementary Table S1.** Energy and crude-protein concentration of feed ingredients in the diets for the cattle used in Exp 1

| Item                       | Net-energy concentration (MJ/kg-DM) |            | Crude protein (% DM) |
|----------------------------|-------------------------------------|------------|----------------------|
|                            | Maintenance (NEm)                   | Gain (NEg) |                      |
| Alfalfa hay                | 4.60                                | 1.09       | 13.0                 |
| Wheat straw                | 3.97                                | 0.00       | 3.0                  |
| Concentrate <sup>1</sup>   | 8.08                                | 6.15       | 20.7                 |
| Corn grain                 | 9.39                                | 7.21       | 8.5                  |
| Wheat bran                 | 6.95                                | 4.50       | 14.3                 |
| Cottonseed meal            | 7.35                                | 6.49       | 43.5                 |
| Soybean meal               | 8.71                                | 6.20       | 44.2                 |
| Stone powder               | -                                   | -          | 0.00                 |
| Calcium hydrogen phosphate | -                                   | -          | 0.00                 |
| Sodium chloride (NaCl)     | -                                   | -          | 0.00                 |
| Premix                     | -                                   | -          | 0.00                 |

DM, dry matter.

<sup>1</sup> Concentrate comprised of 49.1% of corn grain, 9.7% of wheat bran, 14.6% of cottonseed meal, 19.9% of soybean meal, 2.4% of stone powder, 0.7% of calcium hydrogen phosphate, 1.2% of sodium chloride (NaCl), and 2.4% of premix (on a dry-matter basis).

Source: *Feeding Standard for Beef Cattle* [12].

**Supplementary Table S2.** Calculation of dietary allowance for the cattle used in Exp 1

| Item                                                               | HC    | LC    |
|--------------------------------------------------------------------|-------|-------|
| Body weight <sup>1</sup> (kg)                                      | 227.5 | 265.5 |
| Target daily body-weight gain (kg/d)                               | 1.0   | 1.0   |
| Energy requirement <sup>2</sup>                                    |       |       |
| Net energy for maintenance (NEm, MJ/d)                             | 18.86 | 21.17 |
| Net energy for gain (NEg, MJ/d)                                    | 11.15 | 12.51 |
| Net energy for maintenance and fattening (NEmf, MJ/d)              | 31.03 | 35.27 |
| Correction factor (F)                                              | 1.034 | 1.047 |
| Dry-matter intake <sup>2</sup> (kg/d)                              | 6.00  | 6.58  |
| Composition of experimental diet (% DM)                            |       |       |
| Alfalfa hay                                                        | 30.0  | 43.3  |
| Wheat straw                                                        | 30.0  | 43.3  |
| Concentrate <sup>3</sup>                                           | 40.0  | 13.3  |
| Net-energy concentration of experimental diet <sup>4</sup> (MJ/kg) | 8.59  | 6.08  |
| Crude-protein concentration of experimental diet <sup>4</sup> (%)  | 13.07 | 9.69  |
| Total allowance (estimated, kg-DM)                                 | 3.61  | 5.79  |
| Allowances of feed ingredients (kg-DM)                             |       |       |
| Alfalfa                                                            | 1.08  | 2.51  |
| Wheat straw                                                        | 1.08  | 2.51  |
| Concentrate <sup>3</sup>                                           | 1.45  | 0.77  |

DM, dry matter; HC, cattle fed high-concentrate diet; LC, cattle fed low-concentrate diet.

<sup>1</sup> The body weight at the time of calculating the daily allowance was used. Therefore, according to the body-weight at the start of Exp 2, the allowances were adjusted.

<sup>2</sup> Calculated on the basis of estimation equation presented in *Feeding Standard for Beef Cattle* [12].

<sup>3</sup> Concentrate comprised of 49.1% of corn grain, 9.7% of wheat bran, 14.6% of cottonseed meal, 19.9% of soybean meal, 2.4% of stone powder, 0.7% of calcium hydrogen phosphate, 1.2% of sodium chloride (NaCl), and 2.4% of premix (on a dry-matter basis).

<sup>4</sup> Calculated on the basis of energy and crude-protein concentrations of feed ingredients in Supplementary Table S1.

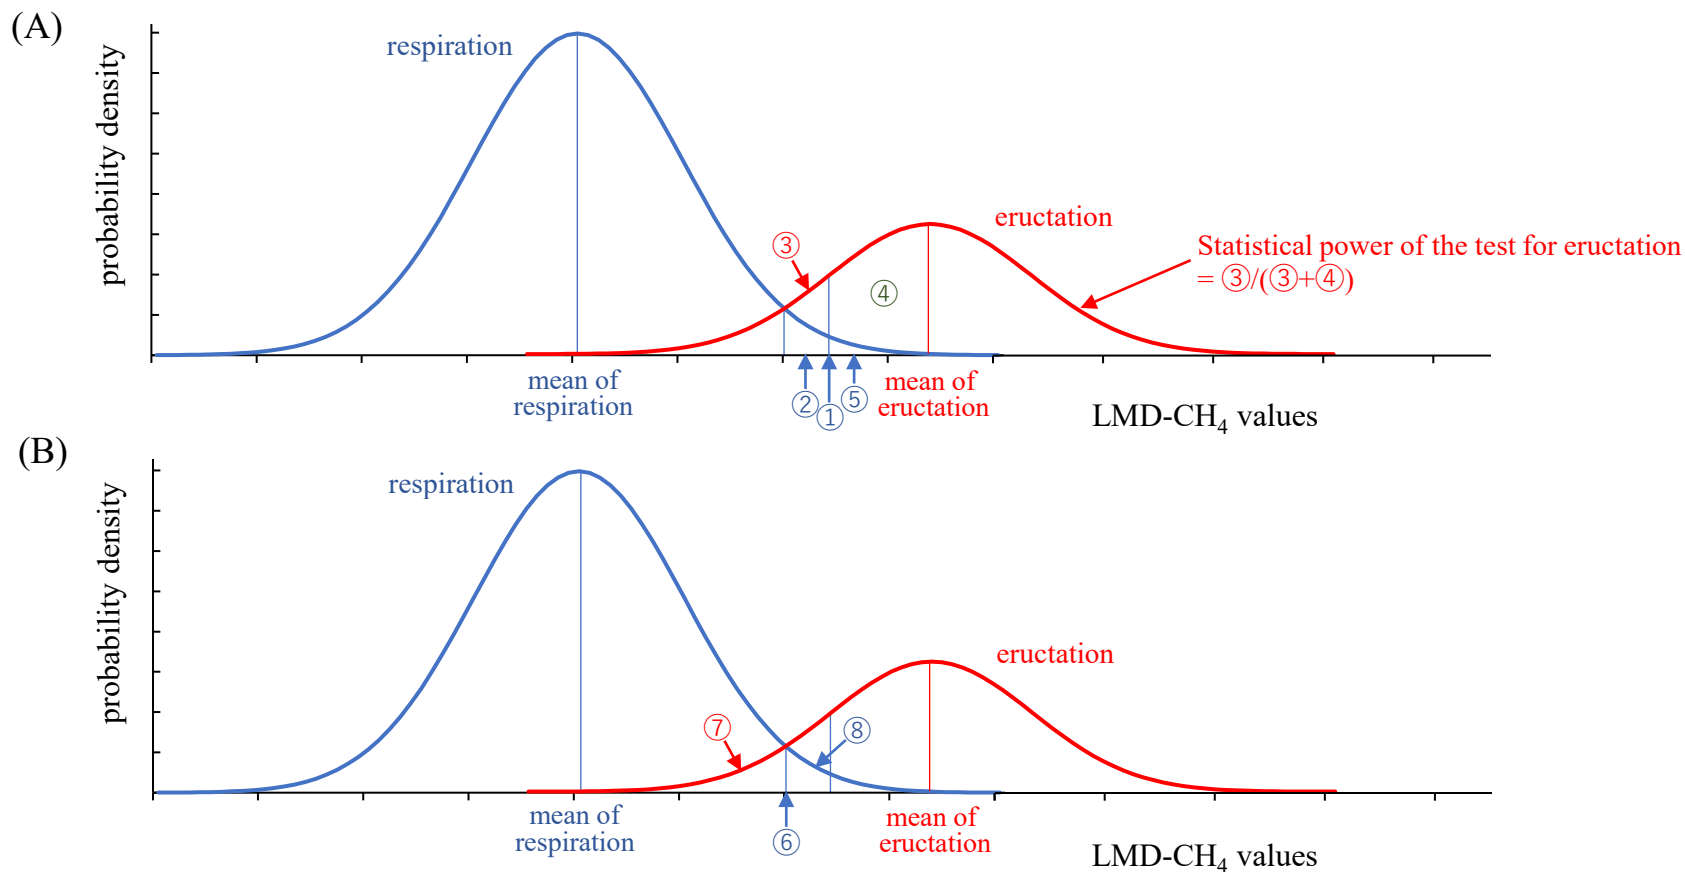

**Supplementary Figure S1. Categorization of each LMD-CH<sub>4</sub> value into the value in the normal distribution for respiration or the value in the normal distribution for eructation.** A previous report [9] mentioned the threshold at the LMD-CH<sub>4</sub> value with 99% cumulative probability for respiration (①) for separating each LMD-CH<sub>4</sub> value into the value for respiration or for eructation. That is, the area ⑤ shares 1% of total probabilities for respiration. However, in this threshold, it was expected that more values (datapoints) were categorized into respiration part (because the area ③ > the area ⑤) (Figure A). For example, in this method, the value ② are categorized as respiration, though the probability (likelihood) is higher for eructation than for respiration. Therefore, in the current study, we set the threshold so that all the LMD-CH<sub>4</sub> values were categorized into the part for which the values had a higher probability. By setting the threshold at the point ⑥, the statistical errors for both normal distributions would be equal (⑦ = ⑧), and the sum of these two statistical errors (⑦ + ⑧) could be minimized (Figure B).
